# Supplementary material for: Sub-classification based specific movement control exercises are superior to general exercise in sub-acute low back pain when both are combined with manual therapy: A randomized controlled trial
Source: Springer Nature journal article supplement (doi:10.1186/s12891-016-0986-y), 2016-03-22
Supplement: MOESM1 [file 9753186]

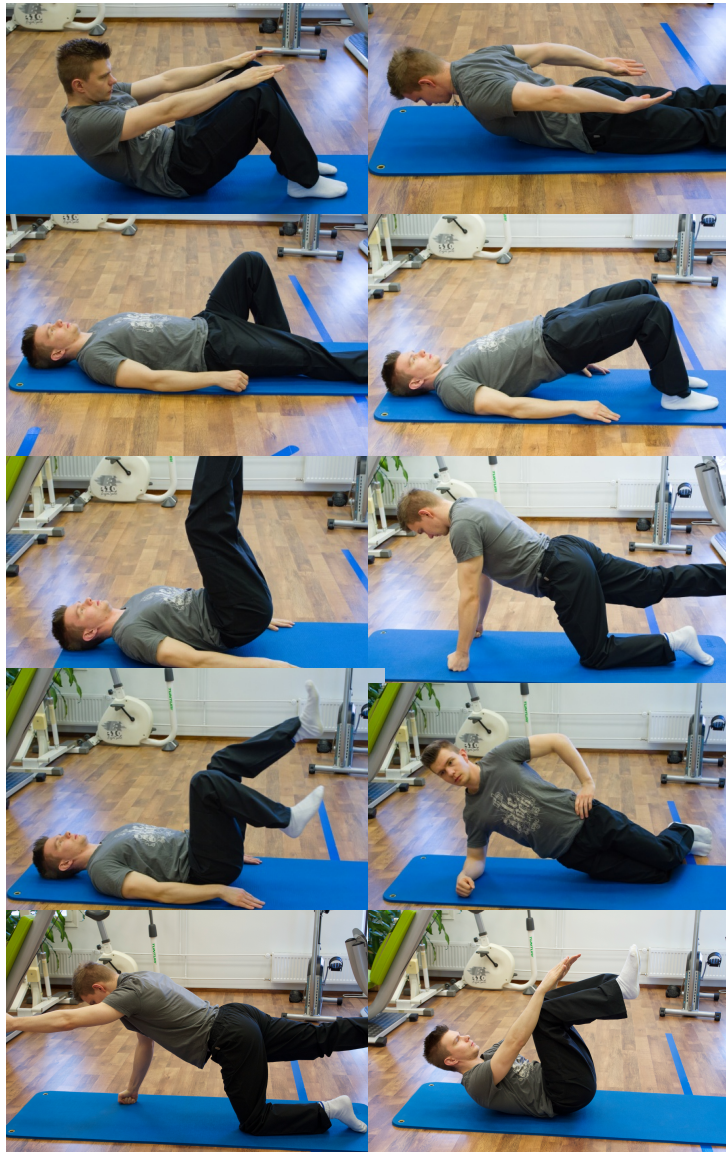

Additional file 1: Gereraexercises program.
